# Supplementary material for: Association between bone marrow adipose tissue, abdominal adipose tissue distribution, and volumetric bone mineral density in the Chinese adult population: a retrospective cohort study
Source: PeerJ. 2025 Dec 4;13:e20446. doi: 10.7717/peerj.20446 (PMC12682217; doi:10.7717/peerj.20446)
Supplement: Supplemental Information 1 [file peerj-13-20446-s001.xlsx]

## Sheet: Sheet1
Age	sex	SAT_1	VAT_1	TAT_1	SAT_2	VAT_2	TAT_2	QCT_PSarea	QCT_Psfat	QCT_totalarea	L1BMD	L2BMD	avgBMD	L1PDFF	L2PDFF	avgPDFF	BMIgroup	BMI	Hpressure	Lpressure	Hb	PLT	ALT	AST	ALP	GLU	HDL-C	LDL-C	smoking	drinking
31	1	101.9	69.7	171.6	149.4	90.2	239.6	61.6	0.2	61.8	174.6	166.6	170.6	28.9	31.7	30.3	3	25.28	125	75	139	238	16	15.2	101	5.72	1.15	2.91	0	0
33	0	148	80.3	228.3	130.4	71.7	202.1	33.3	0.2	33.5	202	192.3	197.15	32.3	34.7	33.5	2	22.36	107	74	142	280	11	13.2	83	5.62	1.18	2.01	0	0
40	0	144.1	113.3	257.4	123	68.5	191.5	42.2	3.4	45.6	136.9	133.4	135.15	37	45.8	41.4	2	23.99	115	68	146	378	16	18.7	92	6.14	1.29	3.26	0	0
26	1	82.7	178	260.7	70.1	111.5	181.6	47.8	1.2	49	150.5	155.5	153	50.4	53.8	52.1	3	24.33	139	79	172	324	44	26.5	87	5.51	1.39	3.79	1	1
28	1	80.9	151.3	232.2	105.8	161.6	267.4	67.2	0.3	67.5	154.5	152	153.25	48.3	44.7	46.5	3	25.99	120	73	158	332	38	30.2	97	5.96	1.09	3.59	1	0
35	0	114.1	56.8	170.9	114.7	55.9	170.6	34.1	1.3	35.4	176.3	177.1	176.7	35.1	36.2	35.65	3	25.78	118	79	133	250	14	18	71	5.35	1.38	1.7	0	0
38	0	100.3	89.4	189.7	116.4	37.3	153.7	33.1	1.6	34.7	176.5	181.8	179.15	36.6	36.6	36.6	2	23.53	128	76	133	242	34	29.3	60	5.36	1.52	2.63	0	0
35	0	109.4	74.5	183.9	54.5	116.7	171.2	41.9	0.7	42.6	159.5	156.2	157.85	27.1	26.6	26.85	2	21.45	112	78	128	196	6	15.6	44	4.56	1.33	2.04	0	0
36	0	84.7	40.1	124.8	109.7	37.8	147.5	34.6	1.2	35.8	197	206.6	201.8	22.6	26.3	24.45	2	23.28	91	53	138	331	10	12.8	40	5.74	1.2	2.4	0	0
43	0	128.7	94.7	223.4	145.6	52.9	198.5	34.4	2.6	37	135.3	136.2	135.75	33.6	33.3	33.45	2	22.88	120	74	121	335	7	14.4	62	5.33	1.11	2.76	0	0
39	1	18.5	25.2	43.7	36.2	19.2	55.4	57.6	1.3	58.9	135.4	129.8	132.6	36.4	35.4	35.9	2	19.07	124	78	151	276	12	15.8	67	4.9	1.02	2.26	0	0
48	1	65.1	175	240.1	126.6	97.7	224.3	47.4	2.3	49.7	133.3	122	127.65	61.6	58.8	60.2	3	24.38	124	78	153	180	17	18.6	91	5.53	1.12	2.19	1	0
47	1	101.9	160.5	262.4	142.3	123.2	265.5	58.6	3.6	62.2	154.9	143	148.95	46.3	47.2	46.75	3	26.09	128	75	150	219	17	21.7	105	5.48	0.76	2.86	0	0
28	0	170.5	110.6	281.1	171.8	58.1	229.9	55.2	0.7	55.9	168.7	169.9	169.3	29.4	35.3	32.35	4	28.22	121	84	141	220	51	44.1	94	5.36	1.06	2.34	0	0
35	1	49.4	66.7	116.1	71.4	66.4	137.8	51.3	0.5	51.8	85.7	89.3	87.5	46.3	47.8	47.05	1	21.6	140	80	170	330	42	20.4	99	5.13	1.11	3.52	0	0
56	1	40.4	266.7	307.1	50	159.5	209.5	41.3	1.1	42.4	92.6	80.2	86.4	49.8	44.1	46.95	2	23.73	119	77	154	261	15	21.5	102	6.67	1.32	3.01	0	0
57	0	133.8	224.5	358.3	141.3	118.5	259.8	31.4	1.9	33.3	120.8	113.1	116.95	45.5	43.2	44.35	2	23.3	124	81	140	432	15	17.2	92	5.87	1.22	4.25	0	0
31	1	137.2	227.4	364.6	145.2	131.4	276.6	56.6	3	59.6	138.5	138.1	138.3	48.7	49.2	48.95	3	26.31	135	87	150	221	24	25.2	68	5.03	1.42	3.16	0	0
40	0	163	101.5	264.5	202.6	75	277.6	40.8	2.6	43.4	150.9	148.8	149.85	49.6	48.2	48.9	2	21.83	113	72	123	326	13	16.1	65	5.43	0.84	2.24	0	0
54	1	71	224.9	295.9	99.1	220	319.1	51.7	2.8	54.5	89.9	84.3	87.1	59.7	53.5	56.6	3	26.89	137	84	151	331	29	22	94	5.27	0.82	2.26	0	0
42	0	228.6	168.3	396.9	226	167.2	393.2	44.3	2.7	47	132.2	129.2	130.7	25	26.1	25.55	4	28.58	110	78	131	233	17	17.5	56	5.39	1.16	2.88	0	0
47	1	23.1	46	69.1	47.3	34.8	82	36.9	0.4	37.3	183.2	185.8	184.5	42	43.5	42.75	2	20.76	103	63	161	233	14	24.1	57	5.04	1.5	3.06	1	0
30	0	56.6	15.1	71.7	91.1	35.2	126.4	31.3	1	32.3	166.1	172.2	169.15	30.7	32.6	31.65	2	20.32	109	66	126	272	8	12.5	42	5.48	1.34	2.11	0	0
33	1	98.4	172.2	270.6	106.4	153	259.4	70.1	1.9	72	197.7	189.7	193.7	41.6	43.8	42.7	3	25.37	126	76	153	199	31	20.9	80	5.43	0.75	2.25	0	0
32	0	172.7	108.1	280.8	166.7	96.1	262.8	43	2.4	45.4	166	170.6	168.3	28.4	25	26.7	3	25.71	115	65	114	332	10	18	69	4.85	0.99	2.4	0	0
49	0	175.6	180.6	356.2	233.8	258.7	492.5	44.4	3.7	48.1	104	101.4	102.7	51.5	58.7	55.1	3	24.39	126	76	126	202	24	22.6	80	5.05	1.27	2.58	0	0
31	1	68.9	70.4	139.3	85.5	40.4	126	47.1	0.6	47.7	192.4	181	186.7	36.8	41.3	39.05	2	21.78	126	73	159	204	14	12.8	70	5.3	1.25	2.65	0	0
34	0	105.5	51.7	157.2	103.1	39.9	143	31.8	3	34.8	245.2	243.2	244.2	27.3	28.8	28.05	2	21.48	112	72	111	197	19	20.9	67	4.35	1.14	3.05	0	0
36	1	74.5	111.6	186.1	100.6	96.9	197.5	52.5	1.4	53.9	164	161.7	162.85	51	48.8	49.9	3	24.22	120	72	154	343	10	14.8	无	4.3	1.3	2.75	0	0
43	1	148.1	273.6	421.7	168.4	259.3	427.7	51.8	0.4	52.2	176.5	185.3	180.9	38.8	33.7	36.25	3	27.17	131	71	148	307	50	28.1	91	5.5	1.09	3.4	0	0
29	0	124.7	101.8	226.5	74.8	36.5	111.4	51.1	1.5	52.6	179.3	183.1	181.2	40.9	40	40.45	2	21.16	113	82	142	196	12	14.7	52	4.47	1.27	1.96	0	0
30	0	84.3	35	119.3	109.9	40.8	150.7	28.4	1.5	29.9	165.9	157.4	161.65	30.4	32.1	31.25	2	21.32	99	65	103	247	11	20.9	76	4.8	1.16	2.73	0	0
54	1	83.3	233	316.3	102.4	131	233.4	52.6	3.1	55.7	112.2	104.4	108.3	47.3	41	44.15	3	25.34	121	82	154	226	23	19.4	41	7.4	1.28	3.6	0	0
36	0	153.1	104.9	258	158.2	55.7	213.9	39.7	1.6	41.3	198.2	204.3	201.25	25.7	23.9	24.8	3	24.41	122	70	122	257	10	13.7	58	4.95	1.2	2.73	0	0
34	1	84.5	139.4	223.9	100	146.8	246.8	49.6	1.8	51.4	117.4	125.4	121.4	53.8	51.5	52.65	3	25.71	126	62	164	231	50	28.8	63	4.66	1.17	3.5	0	0
43	0	165.9	82.3	248.2	141.8	50.9	192.7	42.5	4.5	47	166.4	155.3	160.85	36.1	34.8	35.45	2	23.88	123	82	140	242	20	25.4	54	4.39	1.47	3.14	0	0
47	1	139.7	124.1	263.8	194.4	89.7	284.1	64.2	1.8	66	132	126	129	47.1	40.8	43.95	4	29.94	131	87	158	245	23	21.4	55	5.26	1.21	3.14	0	1
46	0	70.4	95.2	165.6	81.5	67.6	149.1	31.2	1.7	32.9	184.4	185.6	185	40.8	36.7	38.75	2	22.43	114	70	129	278	18	23.2	69	5.79	1.06	2.81	0	0
54	1	78.9	38.7	117.6	119.9	104.9	224.8	35.8	1.8	37.6	162.4	145.8	154.1	47.6	51.1	49.35	3	25.71	112	74	148	221	16	22.3	86	5.23	1.33	2.52	0	0
26	0	102.2	32.1	134.3	140.2	72.9	213.1	24.5	1.3	25.8	185.9	179	182.45	22	25.9	23.95	3	25.46	116	85	137	328	18	18.7	64	5.34	1.28	2.68	0	0
34	0	57.3	15.1	72.4	64.3	22.9	87.2	31.3	0.6	31.9	177.1	178.2	177.65	38.3	37.1	37.7	2	19.63	131	77	123	340	7	15.1	46	4.81	1.11	2.38	0	0
35	1	216.5	103.4	319.9	149.4	195.9	345.3	39.1	3.4	42.5	213.6	206.7	210.15	29.7	29.8	29.75	2	23.74	153	103	185	273	38	24.5	108	5.07	0.97	1.83	0	0
42	1	161.8	334.7	496.5	166	238.1	404.1	77.5	3.1	80.6	138.7	133	135.85	45.7	43.1	44.4	4	28.09	112	74	159	284	33	19.1	91	6.17	0.94	3.18	0	0
35	1	101	176.1	277.1	108.3	118.1	226.4	46.8	2.7	49.5	156.1	149.2	152.65	30.1	29	29.55	2	23.31	124	78	175	192	33	25.1	60	4.63	1.19	4.03	1	0
47	1	84.1	187.1	271.2	113.3	87.5	200.8	53.3	1.6	54.9	118.6	126.1	122.35	48.6	44.8	46.7	3	25.44	122	83	159	235	42	23.5	87	5.22	1.12	2.51	0	0
49	1	146.1	236.1	382.2	150.5	157.9	308.4	54.6	4.8	59.4	96.5	95.6	96.05	54.9	51.1	53	4	28.13	122	72	156	332	15	20.9	89	4.23	0.92	2.68	0	0
52	1	77	135.3	212.3	119.1	103.8	222.9	53.1	2.9	56	114.9	113.3	114.1	57.7	58.8	58.25	3	24.45	156	95	157	227	20	22.8	62	5.17	0.81	2.95	1	0
55	0	105.1	75.8	180.9	118.1	87.5	205.6	27.8	5.4	33.2	141.7	140.6	141.15	40	39.4	39.7	2	20.77	102	60	143	178	16	22.6	59	4.48	2.33	2.09	0	0
41	0	66	25.1	91.1	92.8	30.5	123.2	27.7	1.3	29	165	164.5	164.75	30.7	32.5	31.6	2	21.57	119	76	116	264	11	21.6	64	5	1.4	2.65	0	0
45	0	54.3	15.3	69.6	70.5	25.1	95.7	36.9	2.7	39.6	180.8	171.2	176	38.8	41	39.9	2	21.23	116	68	127	265	10	20	60	5.02	1.51	2.47	0	0
33	1	20.3	33.7	54	59.2	46.8	106	32	1.4	33.4	143.3	141.7	142.5	57	46.8	51.9	2	19.2	122	75	149	210	10	15	119	5.47	1.75	2.12	0	0
31	0	130.3	66.6	196.9	116.2	45.1	161.3	35.4	2.5	37.9	221.8	180.5	201.15	27.6	32.6	30.1	2	20.54	112	74	128	327	9	17.5	45	5.32	1.21	2.72	0	0
36	0	156.1	107.1	263.2	125.9	77.8	203.7	38.4	1.8	40.2	207.8	211	209.4	27.4	18.5	22.95	3	25.46	95	65	128	253	15	18.8	60	5.54	1.02	2.2	0	0
32	0	190.6	69.8	260.4	170.6	61.5	232.1	32.8	2.3	35.1	193.4	189.6	191.5	36.5	44.9	40.7	3	25.52	117	78	126	289	28	25.8	48	4.34	1.01	2.53	0	0
33	1	103.2	177.5	280.7	106.7	74.2	180.9	55	1.6	56.6	130	124.5	127.25	47.4	48.5	47.95	2	22.59	126	75	159	263	30	31.6	30	5.54	1.1	2.61	0	0
37	0	161.5	77.9	239.4	138.8	66.1	204.9	41	1.7	42.7	199	200.4	199.7	42.3	39.4	40.85	2	23.94	121	62	129	134	17	19.9	71	4.7	0.95	1.91	0	0
55	1	6.3	33	39.3	26.6	18.2	44.8	38	0.7	38.7	117.6	114.7	116.15	47.2	46.6	46.9	2	19.84	127	76	146	173	13	17.7	87	3.91	0.84	2.73	0	0
39	1	92.4	134.9	227.3	105.8	96.4	202.2	52.4	1.6	54	138.1	133.5	135.8	62.8	64.3	63.55	2	22.53	124	77	148	231	13	16.4	71	4.51	1.01	2.53	0	0
33	1	48.6	113.2	161.8	84.4	116.4	200.8	63.6	0.7	64.3	148.8	147.7	148.25	57.1	54.8	55.95	2	23.39	106	75	138	225	14	16.5	69	4.88	1.09	1.82	1	1
45	0	175.5	47.6	223.1	243.7	87.8	331.5	28.8	1.8	30.6	157.9	149.9	153.9	35.9	37.5	36.7	4	28.42	130	80	103	315	17	19.7	64	5.53	1.05	2.29	0	0
27	0	183.5	160.7	344.2	201	98.1	299.1	44.2	2.2	46.4	201.8	190.3	196.05	30.9	23	26.95	3	26.45	116	64	139	266	11	16.3	111	4.21	1.37	2.21	0	0
62	1	53.1	113.3	166.4	74.4	42.7	117.1	51.7	1.3	53	178.8	175.2	177	36.2	33.6	34.9	3	26.35	100	56	158	272	16	19.8	66	4.8	1.2	2.27	0	0
32	1	34.7	109.4	144.1	48.3	63.5	111.8	31.4	1.8	33.2	135	134.8	134.9	30.7	27	28.85	1	17.67	110	69	130	217	7	11.9	83	4.97	0.71	2.36	0	0
35	1	96.7	232.5	329.2	123.9	149.5	273.4	50.2	2.5	52.7	176.2	179.3	177.75	36.7	37.2	36.95	3	26.4	139	77	151	219	21	16.4	73	5.56	0.76	3.53	1	0
29	0	182.9	109.9	292.8	154.6	88.1	242.7	37.2	1	38.2	166.2	164.3	165.25	25.6	25.9	25.75	3	26.13	104	77	136	282	14	16.5	50	4.5	0.87	2.99	0	0
31	0	56.3	13	69.3	79	19.4	98.5	32.7	1.1	33.8	220.3	226.5	223.4	18.4	19.8	19.1	2	19.75	113	69	120	276	12	22.9	49	4.36	1.31	2.32	0	0
41	0	85.4	40.9	126.3	93.4	38.7	132.1	33.1	1.5	34.6	138.1	138.2	138.15	28.4	30.7	29.55	2	19.74	107	77	103	391	7	13.6	62	5.76	1.23	1.47	0	0
50	0	41.1	28.3	69.4	49.7	15.4	65.1	42.3	1	43.3	152.2	156.5	154.35	30.4	31	30.7	2	20.31	114	68	114	190	13	21.6	52	4.29	1.43	2.52	0	0
46	0	137.3	111.2	248.5	132.7	95.6	228.3	35.9	2.5	38.4	140.4	137	138.7	41.7	41.4	41.55	2	23.59	127	75	151	280	19	22.8	76	5.14	1.32	3.04	0	0
57	0	105	121.1	226.1	143.9	103.4	247.3	37.7	1.3	39	147	142.2	144.6	50.1	52.9	51.5	2	22.14	121	88	144	247	16	28.8	101	6.17	1.4	3.71	0	0
31	0	142.5	58.1	200.6	131.3	79.8	211.1	41.5	0.8	42.3	186.8	179.8	183.3	49.9	44.7	47.3	2	23.83	102	70	136	247	27	26	47	5.59	1.25	2.1	0	0
36	1	99.6	178.2	277.8	121.2	146.1	267.3	54.3	1.4	55.7	163	156.6	159.8	42.8	44.1	43.45	3	24.13	121	70	145	208	24	19.9	124	4.86	0.95	2.64	1	0
30	1	123.3	126.3	249.6	117.9	142.5	260.4	64.6	1.4	66	221.3	218.5	219.9	32.1	32.2	32.15	3	26.58	122	76	149	192	39	149	52	5.99	1.15	3.08	0	0
61	0	112.8	80.7	193.5	108.7	87.5	196.2	31.6	0.6	32.2	70.8	64.1	67.45	58.4	55.6	57	2	21.76	106	62	122	222	24	122	184	6.31	1.33	3.16	0	0
36	1	97.5	172.3	269.8	127	101.5	228.5	51.2	3.8	55	130.8	145.5	138.15	49.3	48.5	48.9	3	25.35	129	85	136	281	18	136	67	5.89	1.46	2.13	0	0
54	0	87.9	80.5	168.4	79.4	77.6	156.9	27.4	2.7	30.1	83.9	88.1	86	56.3	57.4	56.85	2	20.5	115	65	113	246	9	14.5	102	4.84	0.85	2.05	0	0
21	0	110	94.8	204.8	116.4	59.6	176	32.9	0.8	33.7	189.6	185.4	187.5	36	37	36.5	2	21.34	95	59	141	242	6	18.2	66	5.11	2.11	2.81	0	0
41	1	77.9	224.6	302.5	105.8	196.3	302.1	62.9	1.7	64.6	147.3	150.2	148.75	52.4	54.1	53.25	3	25.7	115	65	162	166	25	23.6	63	6.02	0.78	1.86	0	0
34	1	160.7	204	364.7	184.3	140.9	325.2	68.5	2.1	70.6	167.6	166.9	167.25	49.2	45.2	47.2	4	30.46	133	80	160	259	16	17.4	87	5.38	1.03	3.34	1	0
32	0	118.2	35.9	154.1	148.4	53.9	202.3	30.9	1.1	32	141	148.4	144.7	37.2	41.5	39.35	2	23.44	117	79	142	331	21	19.4	88	4.85	1.37	2.11	0	0
34	0	69.1	42.4	111.5	72.1	44.3	116.4	34.2	0.7	34.9	178.3	175.5	176.9	38.1	37.7	37.9	2	21.64	126	68	127	249	12	20.6	52	5.24	1.23	1.97	0	0
48	1	80.8	144	224.8	101.1	121.6	222.7	43.3	0.9	44.2	163.4	155.2	159.3	49	50.2	49.6	2	21.87	109	77	145	215	18	24	104	5.5	0.82	3.01	0	0
40	0	137.4	111.4	248.8	163	66.1	229.1	37.6	1.5	39.1	188.6	193.4	191	38.9	37.7	38.3	2	21.23	152	120	131	120	9	15.2	57	5.16	1.39	2.78	0	0
29	1	136	146.1	282.1	114.1	108.8	222.9	46.5	2.4	48.9	157.3	167.5	162.4	38.5	39.9	39.2	3	26.46	133	91	169	309	19	17.2	105	5.34	1.08	2.66	1	0
60	0	152	95.5	247.5	139.8	89.3	229.1	35.1	2.1	37.2	127.9	118.6	123.25	51.1	45	48.05	2	22.94	124	72	138	215	9	15.5	109	5.13	1.23	3.08	0	0
45	1	64.7	204.3	269	67.4	171.8	239.2	49.3	1.4	50.7	163.2	155.8	159.5	58.5	57.7	58.1	3	25.01	123	79	171	163	82	53.4	74	4.51	0.96	3.72	1	1
51	0	136	98.6	234.6	139.7	86	225.7	32.4	2.6	35	78.1	72.7	75.4	70.7	72.8	71.75	2	23.18	124	73	131	266	15	21.4	61	5.16	1.5	3.12	0	0
45	0	178.8	160.5	339.3	163.2	81.5	244.7	37.5	5.4	42.9	117.4	107.6	112.5	43.9	38.8	41.35	3	26.56	99	60	129	260	10	18.2	67	4.9	1.13	3.33	0	0
34	0	70.9	47.4	118.3	70.8	20.5	91.4	29.9	1.1	31	180.1	169.8	174.95	46.8	52.4	49.6	1	17.89	116	73	120	212	12	15.5	75	5.49	1.24	1.63	0	0
51	1	51	109.5	160.5	57.1	141.1	198.2	49.3	1.3	50.6	118.7	114.3	116.5	45.9	51.1	48.5	2	22.53	150	100	163	201	25	30.4	125	5.99	1.54	2.5	0	0
40	0	106.1	127.4	233.5	124.3	126.2	250.5	32.9	0.8	33.7	210.5	207.9	209.2	37.2	38.5	37.85	2	21.01	109	72	141	255	15	17.8	66	5.32	0.98	3.33	0	0
46	0	62.2	33.4	95.6	78.8	50.1	128.9	41.8	0.6	42.4	168.3	176.5	172.4	42.1	43.6	42.85	2	20.31	95	59	127	280	10	17.5	47	4.77	1.21	2.7	0	0
38	0	139.2	82.1	221.3	141.5	48.9	190.4	37.8	1	38.8	187	183.3	185.15	45.3	44.9	45.1	2	22.43	114	68	123	337	19	20.4	87	5.02	1.21	2.74	0	0
39	1	113.8	184.3	298.1	150.6	131.9	282.5	54.1	1.4	55.5	171.8	169.7	170.75	44.5	43.4	43.95	3	24.16	123	79	143	154	23	21.2	49	5.52	0.98	2.12	0	0
58	0	146.3	105.1	251.4	167.4	70.3	237.7	29.9	2.1	32	142.9	129.1	136	65.8	50.8	58.3	2	21.93	119	78	113	146	15	25.2	68	5.08	1.05	2.89	0	0
35	1	10	19.2	29.2	22.2	12	34.2	37.2	0.3	37.5	144.2	148.3	146.25	42.9	39.3	41.1	2	18.07	102	63	143	200	12	17.1	61	5.03	0.94	2.3	1	1
48	1	48.8	77.1	125.9	80.8	72.7	153.5	49.2	0.9	50.1	77.7	70.1	73.9	60.6	57.1	58.85	2	22.23	152	92	161	287	15	24	110	6.47	1.34	2.97	0	0
32	1	88.8	126.4	215.2	111	131.2	242.2	39.7	3.2	42.9	136.5	133.1	134.8	62.7	67	64.85	2	22.34	135	75	147	246	37	23.7	67	5.22	1.25	2.23	1	1
35	0	118	79.5	197.5	121.9	64.2	186.1	41.3	1.5	42.8	144.6	142.7	143.65	47.6	48.4	48	2	23.47	112	78	153	285	11	13.5	109	5.02	1.17	2.88	0	0
39	1	72.9	134.5	207.4	90.7	110	200.7	51.8	1.3	53.1	120.7	119.9	120.3	51	50.3	50.65	2	23.14	117	67	142	190	19	15	70	5.85	0.9	2.69	0	0
33	1	108.7	162.5	271.2	81.6	147.9	229.5	47	1	48	201.6	202.1	201.85	36	35.9	35.95	3	25.83	125	77	144	204	20	19.5	133	5.04	0.92	2.6	0	0
55	1	38.8	28.1	66.9	40.9	19.1	60	38.3	1.5	39.8	202.4	188.1	195.25	31.1	32.7	31.9	2	21.33	112	73	102	248	38	53.6	103	4.9	1.31	2.21	0	0
36	0	116.4	31.2	147.6	129.1	55.3	184.4	33.8	1.2	35	163.1	170.5	166.8	36.4	42.3	39.35	2	21.76	100	69	115	261	9	16.8	59	4.93	1.55	2.47	0	0
60	1	111.8	266.7	378.5	93.9	204.2	298.1	49.4	2.8	52.2	75.3	69.8	72.55	68.5	72.9	70.7	4	28.2	149	82	132	151	16	27.3	67	4.85	1.25	2.93	1	1
38	1	4.7	20.7	25.4	22.3	14.9	37.2	36.7	0.2	36.9	132.5	133.9	133.2	62.9	60.2	61.55	2	19.83	114	60	163	235	17	17.8	113	4.66	1.11	2.74	0	0
28	1	181.8	255	436.8	169.5	220.6	390.1	65.6	1.5	67.1	148.3	146.9	147.6	49	39.3	44.15	4	30.1	132	93	170	237	29	27.4	97	5.66	0.97	2.38	0	0
41	1	72.2	199.6	271.8	88.4	166.7	255.1	54.9	1.7	56.6	139.9	135.5	137.7	46.6	47.1	46.85	3	24.54	103	70	159	139	24	23.9	53	4.96	0.9	2.95	1	0
23	1	22.3	22.7	45	33.6	20.9	54.5	51.9	0.9	52.8	159.6	142.1	150.85	56.5	59.8	58.15	2	19.59	130	81	156	303	18	21.5	78	4.6	1.35	2.22	0	0
35	1	148.5	249.5	398	148.6	147.8	296.4	52.8	1.4	54.2	131	136.5	133.75	48.4	39.4	43.9	2	21.47	122	79	150	253	18	22.6	83	5.91	1.11	3.19	0	0
33	1	50.6	112.3	162.9	98.8	162.3	261.1	54.8	1.1	55.9	161.3	155.6	158.45	39	40.8	39.9	2	23.15	118	78	145	233	18	14	80	4.99	0.93	2.71	0	0
21	1	72	118.5	190.5	76	52.6	128.6	42.7	1.4	44.1	188.3	188.2	188.25	31	33.4	32.2	3	24.48	134	74	157	250	17	23.2	91	5.57	1.16	2.75	0	0
53	0	230	146.6	376.6	180.9	118.5	299.4	33.9	5.2	39.1	150.4	132.6	141.5	40.7	41.3	41	3	25.44	111	68	135	262	7	19.8	94	5.39	1.23	3.79	0	0
53	1	73.9	180.3	254.2	66.9	99.3	166.1	47.9	2	49.9	111.3	104.4	107.85	50.4	55.1	52.75	3	24.68	106	67	143	195	13	19.4	72	5.84	1.62	4.26	1	1
43	1	44.1	70.9	115	60.7	85.6	146.3	47.9	0.1	48	107.7	104	105.85	51.2	52.3	51.75	3	24.87	140	85	164	248	19	17.4	112	5.33	1.44	3.02	0	0
32	0	114.1	36.1	150.2	129.4	72.4	201.8	41.1	1.3	42.4	228.8	236.7	232.75	18.5	20.8	19.65	2	23.18	131	98	135	211	9	17.3	66	4.87	1.27	2.12	0	0
33	0	163.9	94.6	258.5	151.9	84.7	236.6	40.9	2.5	43.4	179.7	179.4	179.55	34	38	36	3	25.48	102	64	127	159	8	13.5	41	4.96	1.63	2.41	0	0
40	0	193.8	111.1	304.9	200.2	98	298.2	36.9	1.1	38	162	153.6	157.8	36.1	38.3	37.2	2	23.03	128	60	134	260	11	15.9	45	4.61	1.66	2.68	0	0
35	0	219.7	110.9	330.6	237.3	89.9	327.2	34.9	4.5	39.4	167.7	172	169.85	42.4	44	43.2	3	25.39	105	76	114	178	9	15.5	67	4.55	1.3	2.71	0	0
53	0	125.1	127.6	252.7	134.1	129	263.1	41.6	3.9	45.5	108.5	95.6	102.05	54.3	57.9	56.1	3	24.61	122	72	131	233	21	15.9	164	5.78	1.07	2.68	0	0
38	1	26.8	48.8	75.6	43	83.6	126.6	45.3	0.7	46	139.9	142.3	141.1	38.3	43	40.65	2	21.01	129	91	162	363	15	16.8	89	5.26	1.3	3.95	1	1
20	1	90.8	77.9	168.7	82.5	79.9	162.4	47.8	1	48.8	147.1	142.3	144.7	58.7	58.1	58.4	2	23.15	126	61	166	258	33	20.7	106	5	1.19	2.67	0	0
66	1	55.7	172.8	228.5	64.8	70.5	135.3	43.8	5.4	49.2	88	76.4	82.2	50.3	55.9	53.1	2	21.97	120	70	148	239	11	19.4	88	5.65	1.1	3.26	0	0
27	0	285.6	182.7	468.3	192.2	134.8	327	41.9	2.4	44.3	192.5	191.8	192.15	29.8	26.2	28	4	28.35	121	80	137	388	38	29.4	100	5.04	1.06	2.72	0	0
55	0	167.5	231.4	398.9	220.6	164.7	385.3	44.4	2.3	46.7	111.8	95.7	103.75	62.6	61.1	61.85	3	24.88	137	79	142	211	18	19.2	123	5.29	1.16	2.93	0	0
41	1	23.9	59.4	83.3	69.1	70.4	139.6	42.2	0.6	42.8	129.2	137.6	133.4	42.9	40.8	41.85	2	20.9	122	71	163	189	22	22.5	94	4.97	1.15	1.89	0	0
48	1	209.8	249.5	459.3	222.6	186.4	409	57.2	1.4	58.6	142.5	117.6	130.05	37.4	35.1	36.25	3	27.08	131	86	163	257	18	18.3	103	5.77	1.18	3.51	0	0
32	0	184.3	114.8	299.1	206.3	107.2	313.5	34.4	1	35.4	215.4	211.4	213.4	25.7	21.5	23.6	3	25.89	112	70	133	221	108	30.5	44	4.7	1.57	2.43	0	0
21	1	193	237	430	194.5	238.8	433.3	58.4	2.3	60.7	171.5	162.6	167.05	43.5	45.1	44.3	4	29.86	127	59	164	267	35	22.1	93	5.29	0.9	3.37	0	0
31	1	167.7	222.3	390	180.3	225.6	405.9	52.7	0.8	53.5	182.6	188.1	185.35	51.7	50.8	51.25	3	25.22	128	84	152	370	49	23.5	101	5.68	0.79	3.19	0	0
35	0	106.1	62.7	168.8	137.4	66.3	203.7	25.9	1.8	27.7	166.3	163.1	164.7	35.7	34.3	35	2	19.03	110	69	130	180	13	23.5	80	5.3	1.53	2.97	0	0
41	0	101.9	100.1	202	102.2	90.8	193	41.2	1.5	42.7	133.9	124.7	129.3	40	42.1	41.05	3	25.07	103	60	114	152	6	11.1	39	5.24	1.3	2.96	0	0
42	1	184.3	114.8	299.1	206.3	107.2	313.5	34.4	1	35.4	215.4	211.4	213.4	25.7	23.5	24.6	3	25.23	107	62	133	254	11	15.7	37	4.9	1.57	2.43	0	0
39	1	113.7	217.1	330.8	110.2	179.5	289.7	54.2	0.7	54.9	141.7	139.1	140.4	47.3	42.5	44.9	3	24.69	112	76	141	264	20	16.5	53	5.01	1.14	2.95	0	0
27	1	31.8	22.7	54.5	48.7	42.1	90.8	42.3	0.1	42.4	209.9	202.6	206.25	32.5	28.8	30.65	2	19.27	114	75	154	268	12	14.5	70	5.24	1.13	2.09	1	1
33	1	64.1	176.7	240.8	119.7	181.1	300.8	54	2.3	56.3	129.8	142.9	136.35	49.2	47.9	48.55	2	21.8	119	61	171	223	24	15.3	92	5.1	0.89	3.36	0	0
44	1	58	79	137	79.6	82.7	162.4	56.7	1.1	57.8	165	162.9	163.95	39.4	38.5	38.95	3	24.49	131	81	144	203	10	15.3	60	4.98	1.25	2.82	0	0
30	0	149.3	111.8	261.1	182.7	105.1	287.8	33.4	1.5	34.9	117.2	108.8	113	49	49.6	49.3	3	24.09	100	68	136	287	11	19.5	68	4.53	1.35	2.42	0	0
58	1	74	232.7	306.7	102.7	184.4	287.1	33.5	2.4	35.9	143.8	125.4	134.6	54	58.3	56.15	2	23.53	142	95	148	374	13	19	54	5.44	1.3	2.83	0	0
51	1	88.9	205.2	294.1	101	176.8	277.8	58	2.1	60.1	172.2	169.9	171.05	44.4	49.8	47.1	3	24.91	119	81	137	268	27	21.8	66	5.97	0.91	2.72	1	0
34	1	114	202.3	316.3	117.4	124.6	242	48.4	1.7	50.1	189.9	191.4	190.65	41.7	41.6	41.65	2	22.2	106	81	162	209	15	16.6	67	5.08	1.43	3.23	1	0
24	1	175.9	212.9	388.8	218.6	174.6	393.2	50.4	1.1	51.5	142.1	138.4	140.25	48.7	49.8	49.25	4	28.57	123	87	156	323	32	24.7	84	5.37	1.45	3.56	0	0
49	0	77.7	170.5	248.2	86	142.1	228.1	33.9	1.1	35	131.3	128.3	129.8	50.4	42.9	46.65	3	24	130	81	134	208	11	20	116	5.49	1.11	2.44	0	0
43	0	229.9	128.5	358.4	242	121.7	363.7	50.2	0.8	51	157.2	153.7	155.45	45.7	45	45.35	3	26.08	110	72	136	167	34	32.6	130	5.15	0.96	2.23	0	0
44	1	288.8	295.6	584.4	202.1	186.8	388.9	65.1	2.7	67.8	138.2	139.7	138.95	29.9	26.3	28.1	4	34.6	141	90	158	271	32	19.8	91	6.15	1.48	2.73	0	0
37	0	75.9	49.3	125.2	96.6	42.1	138.6	43.9	1.1	45	166.9	158.8	162.85	43.4	40.6	42	2	23.05	101	53	144	144	11	18	37	4.49	1.3	2.15	0	0
28	1	258.1	256.4	514.5	244.6	212.1	456.7	78.5	2.8	81.3	177	171.1	174.05	46.4	39.9	43.15	4	31.35	131	85	162	224	33	18.8	68	4.84	0.75	1.96	1	0
57	1	81.3	176.7	258	91	137.9	228.9	54.7	1.6	56.3	124.8	126	125.4	51.1	45.2	48.15	3	26.09	123	79	154	147	23	25.2	76	6.06	1.16	3.28	1	1
34	0	181.9	141.5	323.4	128.9	120.8	249.7	46.9	3	49.9	138.6	137.2	137.9	42.6	41.8	42.2	2	23.44	105	60	147	250	11	14.5	66	5.62	0.99	2.7	0	0
33	1	74.8	126.7	201.5	77.3	81.1	158.4	53	1.3	54.3	147.8	129.5	138.65	47	42.9	44.95	3	24.91	130	80	163	243	20	22.7	74	5.29	1.33	2.8	0	0
31	0	101.5	66.1	167.6	86.3	28.5	114.8	43.8	3.8	47.6	138.4	136	137.2	40.3	40.3	40.3	2	20.44	109	70	129	260	16	23.1	106	4.77	1.46	2.74	0	0
44	0	173.7	129.6	303.3	154.2	109.5	263.7	46.2	1.1	47.3	113.2	118.4	115.8	43.6	43.8	43.7	3	26.84	114	85	156	230	12	43	1.2	4.21	1.19	2.62	0	0
35	1	107.5	192.9	300.4	118.2	146.9	265.1	64.3	1.4	65.7	143.3	138.5	140.9	41.3	42.9	42.1	3	25.69	113	74	163	238	63	36.7	97	5.72	0.97	2.52	1	0
25	1	6.5	18.5	25	32.6	23	55.5	53	0	53	153.9	153.9	153.9	43.2	43.3	43.25	2	19.84	118	72	149	174	27	22.1	56	4.92	1.34	2.82	0	0
33	0	102.2	23.3	125.5	97.2	24.6	121.8	33	0.5	33.5	111.8	114.8	113.3	53.2	50.7	51.95	2	21.45	101	74	134	160	16	19.4	90	4.6	1.58	2.78	0	0
44	1	52.6	68.6	121.2	61.7	64.4	126.1	62	1.1	63.1	93	90.3	91.65	50.9	49.3	50.1	3	24.07	115	63	155	167	30	22.3	83	5.27	0.66	1.35	0	0
36	1	66.2	222.5	288.7	70.6	150.9	221.5	44.2	3	47.2	191.1	193.2	192.15	47.2	49.3	48.25	3	24.2	122	89	155	276	29	20.2	101	4.97	0.93	3.05	0	0
36	0	97	61.8	158.8	89.3	58.2	147.5	26	0.9	26.9	162.8	167.1	164.95	42.3	43	42.65	2	20.51	100	64	125	121	9	17.7	85	4.59	1.18	1.76	0	0
27	1	111.7	183.2	294.9	118.4	123.9	242.3	53.9	1.4	55.3	136.6	149.3	142.95	41.7	42.4	42.05	2	23.54	115	72	156	300	33	24.6	120	4.87	0.69	3.11	0	0
46	1	67.9	155.6	223.5	84.3	149.6	233.9	65.2	0.7	65.9	138.1	126.7	132.4	38.6	38.2	38.4	3	27.34	139	88	152	375	14	14.7	96	5.35	0.77	2.62	0	0
39	0	69.6	57.3	126.9	78.6	63.4	142	29	0.4	29.4	132.3	136.9	134.6	29.5	28.4	28.95	2	21.64	97	63	148	199	13	154.9	80	5.27	1.47	1.61	0	0
42	0	169.1	119.3	288.4	150.1	93.8	243.9	44.3	2.4	46.7	143.8	134.2	139	37.6	37.2	37.4	3	26.35	136	90	137	202	8	12.8	44	4.73	1	2.28	0	0
38	0	278.9	113.6	392.5	312.7	68	380.7	46.5	2	48.5	159.1	161.1	160.1	41.3	38.3	39.8	3	26.81	120	73	130	276	136	113.8	68	9.7	0.82	2.53	0	0
49	1	69.6	142.7	212.3	94.8	85.5	180.3	60.3	2.3	62.6	145.7	139.7	142.7	46.1	42.3	44.2	2	23.37	107	80	140	230	15	22.1	79	4.69	0.99	2.42	0	0
36	0	138	123.2	261.2	142.1	87.8	229.9	45	1.6	46.6	222.1	211.6	216.85	28.7	30.3	29.5	2	23.88	134	92	140	207	13	21.2	82	4.7	1.64	2.99	0	0
32	0	102.3	226.6	328.9	88.5	145.6	234.1	61.9	1.9	63.8	185.4	181.3	183.35	33.8	35.7	34.75	3	25.16	122	65	142	224	50	24.6	84	4.75	1.12	2.37	0	0
31	0	48	34.5	82.5	51.5	19.4	70.9	33.1	0.6	33.7	187.4	186.2	186.8	29.5	28.4	28.95	2	18.37	118	65	140	153	6	13	41	5.27	1.5	1.95	0	0
37	1	136.2	199.2	335.4	121.1	104.5	225.6	53	4.1	57.1	201.8	196.5	199.15	36.9	33.4	35.15	3	25.93	115	79	156	246	28	26.1	57	5.82	0.64	2.3	0	1
43	0	116.6	79.5	196.1	118.8	38	156.8	37.8	1	38.8	195.3	194.8	195.05	22.6	21.5	22.05	2	22.31	118	59	110	234	12	22	73	8.44	0.87	2.04	0	0
40	0	160.4	97.3	257.7	158.4	74	232.4	35.7	0.6	36.3	172.4	164.3	168.35	39	39.2	39.1	3	24.61	111	75	137	147	16	12.8	56	4.87	1.56	2.47	0	0
33	1	100.4	146.1	246.5	110.7	105.5	216.2	59.1	1.5	60.6	137.3	135.4	136.35	41.3	46.9	44.1	3	25.76	142	83	175	250	10	17.2	63	5.17	1.09	2.5	1	1
41	1	115.6	235.7	351.3	98.3	151.8	250.1	70.7	1.1	71.8	135.3	142.7	139	51.7	52.8	52.25	3	26.7	125	66	140	320	16	18.6	59	4.55	0.87	3.53	0	0
22	0	205.4	110.5	315.9	173.9	104.4	278.3	42.7	2	44.7	144.6	147.1	145.85	33.1	32.1	32.6	3	26.35	114	57	139	219	11	14	116	6.04	0.9	2.01	0	0
36	0	110.3	44.3	154.6	110	36.8	146.8	37	1.9	38.9	201.5	197.1	199.3	28.3	31.2	29.75	2	19.53	110	98	130	177	11	11.1	48	5.03	0.87	1.68	0	0
65	1	65.5	129.2	194.7	62.4	77.4	139.8	48.9	2.6	51.5	85	68.1	76.55	57.4	57.4	57.4	2	23.59	134	84	137	226	20	20.1	147	5.7	1.15	1.64	0	0
39	1	92.2	194.5	286.7	101.9	99.5	201.4	51	1.4	52.4	125.7	125.9	125.8	46.8	45.6	46.2	3	25.31	138	99	164	233	32	22.5	102	6.17	0.98	1.89	0	1
24	0	72.6	67.8	140.4	69.8	26.3	96.1	30.7	0.4	31.1	192.9	199.8	196.35	23.8	21.3	22.55	2	21.51	119	80	131	276	8	18.1	66	5.58	1.01	2.13	0	0
33	1	95.1	174.7	269.8	85.8	88	173.7	51.3	3.1	54.4	127.6	125.7	126.65	48.2	47.1	47.65	3	25.25	121	78	175	264	22	21.8	85	5.28	0.91	2.17	0	0
30	1	51.6	75.5	127.1	57.8	52.4	110.2	42.8	1.4	44.2	160.4	165.3	162.85	39.6	35.7	37.65	2	23.01	128	81	168	270	36	21.1	58	5.05	0.75	2.89	0	0
31	1	145.6	246.1	391.7	159.2	202	361.2	59.4	1.7	61.1	176	168.1	172.05	43.1	38.7	40.9	4	29.73	130	87	166	297	24	19.6	61	5.41	0.61	2.65	0	0
40	1	134.8	158.7	293.5	113.1	125.4	238.5	53.1	2	55.1	138.4	140.6	139.5	35.6	35.2	35.4	3	25.09	132	79	160	286	50	32.8	111	5.39	1.23	3.39	0	0
46	1	116.6	231.9	348.5	98.3	127.2	225.5	55.9	2.2	58.1	123.5	118.3	120.9	35.4	31.6	33.5	3	25.25	129	65	158	155	17	23.3	97	5.84	0.98	2.53	0	0
53	0	258.8	179.1	437.9	234.4	144.9	379.3	48	2.1	50.1	91.5	80.3	85.9	51.3	46	48.65	4	28.36	141	86	138	243	18	23.6	11	8.25	1.1	3.89	0	0
33	0	75.4	54.3	129.7	84.6	34.4	119.1	34.7	0.5	35.2	208.7	207.6	208.15	45.3	43.5	44.4	2	18.99	112	71	131	184	13	16.7	42	5.26	1.23	2.02	0	0
32	0	228.8	95.1	323.9	250.5	55.3	305.8	39	3.4	42.4	147.6	146.9	147.25	29.2	27.9	28.55	4	28.72	124	84	140	267	13	22.3	56	3.83	1.68	3.03	0	0
31	0	66.1	51.9	118	57.8	40.3	98.1	29	1	30	173.4	172.2	172.8	28.2	29.1	28.65	1	17.9	102	68	128	263	7	12.7	57	4.89	1.46	2.19	0	0
19	1	16.5	21.5	38	32.6	20.3	52.8	54.8	0.7	55.5	137.6	139.8	138.7	49.7	50.2	49.95	1	16.14	121	78	162	296	10	16.7	91	4.68	1.44	2.26	0	0
37	1	21.6	50.7	72.3	29	45.2	74.2	52.8	0.2	53	153.3	153.8	153.55	40.6	41.1	40.85	2	21.22	125	84	167	236	13	23.2	52	5.17	1.5	1.95	0	1
31	1	149.3	200.9	350.2	160.8	205.8	366.6	59.4	2.2	61.6	210.5	201.4	205.95	29	24.9	26.95	3	26.59	112	78	157	252	20	24.6	81	5.22	0.77	2.95	1	0
33	0	154.8	90.5	245.3	179.8	83.4	263.2	39.8	2.3	42.1	175.7	174	174.85	38.2	37.1	37.65	3	24.69	118	81	130	285	14	18.5	62	5.31	1.21	1.76	0	0
48	1	34.9	80.8	115.7	32.8	44.8	77.6	49.3	1	50.3	179.8	168.8	174.3	45.1	44.4	44.75	2	22.23	133	74	148	252	19	27.1	71	5.05	1.38	2.85	0	0
30	1	87.5	235.8	323.3	73.6	123.4	197	58.6	1.6	60.2	154.7	149.5	152.1	42.3	42.7	42.5	3	24.26	120	74	147	192	26	20.5	70	5.54	0.82	3.41	0	0
26	1	41.4	69.2	110.6	60.8	96.5	157.3	56.4	1.1	57.5	165.6	164.2	164.9	33.8	38.7	36.25	2	23.15	122	67	162	223	15	18.3	68	4.99	1.26	2.74	0	0
34	1	97.1	98.8	195.9	84.8	74	158.7	45.9	1.4	47.3	130.4	127.5	128.95	57.3	56.4	56.85	2	22.53	120	65	154	307	11	17.2	93	5.34	1.26	3.11	1	0
30	1	137.7	203.5	341.2	158.9	172.1	331	58.9	1	59.9	153.7	147.1	150.4	42.3	46.2	44.25	4	29.04	121	92	160	218	29	22.5	89	5.96	0.88	2.71	0	0
41	0	141.6	127.4	269	117.2	81.1	198.3	32.4	2.6	35	139.3	145.4	142.35	34.4	36	35.2	2	21.43	166	117	106	248	15	20	98	5.02	1.54	2.55	0	0
41	0	160.3	107.3	267.6	120.5	73.3	193.8	41.8	2.1	43.9	188.6	179	183.8	22.1	29.3	25.7	4	28.04	112	75	128	382	15	18.2	90	5.29	1.15	2.64	0	0
33	1	94.6	170	264.6	98.7	109	207.7	53.1	2.8	55.9	202.1	194.9	198.5	35.7	38.4	37.05	3	24.8	126	80	165	235	16	17.8	94	6.3	1.44	3.72	0	1
45	0	159.1	102.9	262	149.4	68.4	217.8	33.2	2.7	35.9	166.4	157.6	162	32	31.4	31.7	2	21.08	139	90	145	221	26	32.9	52	5.49	1.2	3.03	0	0
32	0	101.9	191.3	293.2	146.7	122.1	268.8	34.7	1.7	36.4	187.5	185.2	186.35	44.1	44.3	44.2	3	24.98	114	72	140	287	14	18.3	78	5.2	0.93	2.78	0	0
36	0	117.7	51.5	169.2	136.1	94.8	230.9	37.2	2	39.2	202	203.9	202.95	30.6	31.1	30.85	2	21.63	120	79	102	259	11	19.4	77	4.62	1.28	3.14	0	0
40	1	85.8	170.6	256.4	74.3	97	171.3	44.6	1.1	45.7	117.1	121.9	119.5	62.3	55.9	59.1	2	22.55	122	78	163	239	24	26.1	87	4.51	1.14	3.49	0	0
31	0	68.5	50	118.5	47.4	31.9	79.4	35.7	1.1	36.8	218.3	221.5	219.9	32.3	32.2	32.25	2	18.07	122	74	153	220	11	16.7	51	4.65	1.64	3.38	0	0
33	1	101.9	191.3	293.2	126.7	182	308.7	46.1	1.7	47.8	154.6	158.7	156.65	44	48	46	3	24.57	115	71	166	216	43	21.9	100	6.07	1.17	4	0	0
36	0	118.7	96.5	215.2	129.9	71	200.9	41.4	1	42.4	169	167.2	168.1	35.7	35.4	35.55	2	20.28	108	67	129	203	8	12.1	58	5.9	0.86	2.3	0	0
28	0	115.4	68.7	184.1	97.6	40.1	137.7	33.8	0.9	34.7	179	175.3	177.15	35.3	35	35.15	3	25.24	96	58	113	206	11	14.2	105	5.32	1.7	2.34	0	0
57	1	93.5	253.3	346.8	109.5	159.9	269.4	58.6	1.9	60.5	109.6	107.5	108.55	56.7	53.6	55.15	3	26.06	121	78	148	195	58	39.2	109	4.44	0.99	3.37	1	1
26	0	135.6	60.8	196.4	137.6	76.7	214.3	40.3	1.5	41.8	157.7	158.7	158.2	31.2	36.1	33.65	2	22.04	114	73	110	254	62	26.3	44	4.59	0.96	1.62	0	0
34	0	163	60	223	165.2	62.8	228	33.1	4	37.1	116.2	97.3	106.75	58.6	68.5	63.55	2	21.76	90	60	127	181	18	17.2	53	4.95	1.74	3.66	0	0
55	1	69.5	129.9	199.4	62.5	64.4	126.9	52.3	3.2	55.5	132	121.3	126.65	49.8	52.6	51.2	2	22.99	118	80	133	155	13	19.8	111	4.95	1.11	1.8	0	0
61	1	9.2	40.1	49.3	21.3	15.9	37.2	45.7	0.6	46.3	89.6	75.9	82.75	60.2	62.1	61.15	2	19.38	106	61	146	121	10	18.6	88	4.64	1.41	2.54	1	0
31	0	91.3	102.1	193.4	90.6	59.8	150.4	40.4	2.7	43.1	127.2	119.6	123.4	46.7	46.7	46.7	3	26.67	118	64	137	414	10	14.8	173	4.86	1.85	2.61	0	0
35	0	225.7	133.9	359.6	213	115.2	328.2	41.7	3	44.7	154.7	155.1	154.9	34.4	38.3	36.35	2	22.04	146	97	139	270	50	19.9	84	4.12	1	1.72	0	0
31	1	65.9	60.5	126.4	48.5	51.5	100	45.2	2.2	47.4	137.5	134.9	136.2	58.1	54.2	56.15	2	21.92	102	61	153	166	23	20.7	53	4.83	0.97	2.43	1	0
65	0	153.5	142.1	295.6	141	98.4	239.4	33.9	4.8	38.7	107.4	111.8	109.6	52.2	54.1	53.15	2	23.89	113	69	134	159	13	17.3	45	5.14	1.22	3.12	0	0
37	1	23.8	22.7	46.5	28.2	16.9	45.1	42.6	0.3	42.9	141.1	134.3	137.7	47.9	48.7	48.3	2	20.96	105	61	151	168	12	18.6	84	4.45	1.33	2.01	0	0
32	1	72.2	149.8	222	78.9	111.4	190.3	51.9	1	52.9	110.7	106.4	108.55	47.5	47.6	47.55	2	21.49	127	75	168	219	11	15	80	5.23	1.06	3.29	0	0
29	0	173.2	135.9	309.1	167.8	99	266.8	42.6	5.6	48.2	165.9	160.2	163.05	49.5	46.9	48.2	3	24.71	91	63	135	222	13	15.4	90	5.39	0.98	2.29	0	0
33	0	68.6	61	129.6	85.4	52.7	138.1	31.6	0.8	32.4	131.8	135.2	133.5	45.9	46.3	46.1	1	16.9	124	66	105	199	6	15.3	58	5.03	1.3	2.26	0	0
30	1	86.5	144.9	231.4	94.8	95.5	190.3	47.8	0.8	48.6	127.8	119.2	123.5	58.2	61.6	59.9	3	25.54	118	66	150	218	16	19.4	70	4.55	1.13	3.14	0	0
39	0	58.6	43.1	101.7	77.5	42	119.5	45	1.3	46.3	193.5	191.2	192.35	28.4	28.5	28.45	3	24.14	120	78	117	189	19	18.8	52	4.66	1.03	2.18	0	0
30	1	102.9	183	285.9	110.8	153	263.8	47.9	0.8	48.7	173.8	168.2	171	41.1	36.7	38.9	2	22.99	118	60	159	206	17	19.2	86	4.71	1.48	3.17	0	0
34	0	56.2	27.4	83.6	72.8	43.9	116.7	37.2	0.3	37.5	167.7	157.6	162.65	39.5	45.2	42.35	2	18.21	107	64	148	198	9	15.7	41	4.38	1.33	2.41	0	0
35	1	122.7	193.4	316.1	129.5	116.8	246.3	60.2	2.1	62.3	179	170.3	174.65	49	49.3	49.15	1	16.82	109	88	158	236	28	21.7	131	4.75	1.03	4.24	0	0
29	0	102.2	48.7	150.9	115.4	48	163.4	39.2	1.4	40.6	146	150.1	148.05	39.5	40	39.75	2	19.47	108	70	121	206	7	16.7	85	4.6	1.6	1.67	0	0
27	0	72.2	61.2	133.4	78.6	49.2	127.8	32.3	0.9	33.2	152.7	157.2	154.95	43.4	44.7	44.05	2	19.49	122	76	131	334	16	23.7	68	4.2	1	1.94	0	0
29	1	95.8	153.3	249.1	127.4	146.3	273.7	65.6	1.4	67	178.1	183.2	180.65	39.4	38.5	38.95	2	23.04	112	71	155	202	12	17.4	84	5.89	1.3	2.43	0	0
35	0	155.6	113.2	268.8	145.4	91.9	237.3	42.8	1.9	44.7	161	157.7	159.35	44	44	44	2	20.31	124	68	123	333	8	16.7	129	4.13	1.95	2.34	0	0
35	1	67.4	76.6	144	75.8	98.6	174.4	60.6	0.6	61.2	132	129.8	130.9	55.2	52.6	53.9	3	26.67	113	70	158	189	26	23.1	96	4.57	1.26	2.62	1	0
24	1	10.1	31.4	41.5	30.9	26.5	57.4	46	0.3	46.3	181.9	178.8	180.35	37.9	38.9	38.4	2	23.8	129	59	171	193	32	21.2	67	4.94	1.17	2.41	0	0
28	1	204.9	193.5	398.4	251	220.9	471.9	72.6	1.1	73.7	193.1	191.9	192.5	38.1	38.5	38.3	2	22.2	118	80	151	89	40	21.2	98	4.45	0.8	2.31	0	0
38	0	100.1	70.7	170.8	89	37.5	126.4	32.8	1	33.8	170.4	160.7	165.55	38.5	36.9	37.7	2	21.8	90	45	123	233	13	14.5	91	5.03	1.22	2.03	0	0
34	0	168.1	138.7	306.8	161.9	83.8	245.7	43.1	0.8	43.9	173.2	170.1	171.65	29.9	33.6	31.75	3	24.22	116	75	137	214	9	13.8	72	4.75	1.22	2.62	0	0
54	0	198.4	219	417.4	172.9	128	300.9	43.7	3.7	47.4	134.4	119.9	127.15	52.4	48.3	50.35	3	25.78	124	78	155	242	12	18.5	106	4.73	0.95	2.32	0	0
21	1	116.2	55.9	172.1	127.9	58.8	186.7	63.2	2.6	65.8	171.8	174.8	173.3	33.4	34.6	34	2	23.01	136	69	141	225	23	23.5	89	4.63	1.11	1.75	0	0
32	1	82.9	174.3	257.2	104.4	97.3	201.7	68.5	2	70.5	155.9	163.4	159.65	41.9	43.8	42.85	1	17.04	128	76	151	166	12	14.3	75	4.96	0.9	2.55	0	0
33	1	76.8	170.2	247	86.6	85.9	172.5	56.5	1.2	57.7	136.2	146	141.1	35.9	34.2	35.05	3	26.03	121	74	150	162	18	21.4	94	5.02	1.31	2.8	0	0
50	0	228.3	112	340.3	218.4	84	302.4	39.7	1.4	41.1	124.3	114.8	119.55	57	62.6	59.8	2	18.4	102	62	141	126	19	27	92	4.97	1.67	2.97	0	0
34	0	109.9	104.5	214.4	125.1	72.7	197.8	34	1.8	35.8	167.5	170.3	168.9	28	29.6	28.8	3	25.91	103	67	128	259	7	11.9	91	4.92	1.34	1.9	0	0
37	0	157.1	87.9	245	166.6	79.5	246.1	31	1.4	32.4	157	163.4	160.2	44.9	44.6	44.75	2	20.99	106	57	137	180	7	15	92	4.68	0.92	2.95	0	0
30	1	130.3	171.1	301.4	143.7	103.9	247.6	57.4	3.1	60.5	155.2	151.2	153.2	47.6	46.3	46.95	2	22.16	120	76	154	239	40	39.3	90	4.85	1.16	2.49	0	0
38	1	26.2	42.8	69	48.1	49.9	98	54.7	0.4	55.1	157.4	158.8	158.1	45.2	45.7	45.45	2	21.36	106	67	163	246	16	18.1	64	4.79	1.5	2.73	1	1
25	1	87.9	131.6	219.5	99.3	105.4	204.7	47.5	0.9	48.4	146.7	140.9	143.8	53.6	57.3	55.45	2	23.81	127	73	155	252	15	16.7	72	5.33	0.86	2.56	0	0
55	0	172	83	255	168.3	53.7	222	28.1	1.2	29.3	116.2	105.8	111	51.8	49.2	50.5	2	22.22	106	65	138	206	13	23.3	117	4.82	1.57	2.5	0	0
36	0	192.8	91.7	284.5	156.3	59.8	216.1	28	3.6	31.6	197.3	200.3	198.8	34	33	33.5	2	23.18	109	78	137	270	9	16	44	4.94	1.38	2.01	0	0
33	1	106.6	175.2	281.8	105.6	144.2	249.8	56.3	1.2	57.5	209.6	200.7	205.15	33.7	29.4	31.55	2	20.76	114	78	147	204	25	19.7	114	4.9	0.87	2.34	0	0
34	0	56.2	29.2	85.4	63.8	25.5	89.3	44	0.9	44.9	232.3	241.8	237.05	16.7	15.8	16.25	2	19.71	138	61	121	159	5	17.4	54	5.3	1.68	2.64	0	0
61	1	110.9	171.2	282.1	141.4	110.9	252.3	51.4	5.3	56.7	89	84.3	86.65	46.2	49.7	47.95	3	24.13	124	78	144	180	15	19.2	92	5.07	1.65	2.49	0	0
33	1	117.5	180.6	298.1	150.5	111.2	261.7	61.3	3.3	64.6	132.2	140.7	136.45	41.7	42.1	41.9	3	26.67	137	85	159	239	26	15.2	92	4.75	0.79	3.04	0	0
54	0	155.7	139	294.7	178.6	113.2	291.8	31.6	5	36.6	112.6	115	113.8	42.6	44.1	43.35	3	25.16	124	77	141	208	12	19.1	108	4.1	1.69	5.33	0	0
32	0	61.6	32.7	94.3	72.2	23.2	95.5	30.4	1.2	31.6	210.4	210.4	210.4	27.8	27.8	27.8	2	21.5	110	75	135	283	19	22	70	4.58	1.24	2.31	0	0
34	0	336.3	104.4	440.7	361.9	103.2	465.1	52.9	2.8	55.7	174.9	167.7	171.3	46.4	47.2	46.8	2	23.58	134	96	158	293	17	17.8	156	5.13	1.4	3.62	0	0
49	0	114.7	84.9	199.6	128.8	67.4	196.2	34.6	1.7	36.3	152.9	148.1	150.5	42.8	39.8	41.3	3	27.55	100	60	141	236	9	16.4	55	4.64	1.35	3.31	0	0
43	1	79.5	234.7	314.2	73.2	173.3	246.5	50.8	0.9	51.7	122	115.6	118.8	46.5	43.2	44.85	2	22.72	125	77	134	351	55	31.9	74	5.17	0.99	2.19	0	0
32	0	184.8	87.6	272.4	182.5	73.6	256.1	36.4	1.4	37.8	126.4	118.9	122.65	55.2	57.7	56.45	2	23.8	98	63	122	171	14	15.6	102	4.63	1.65	3.31	0	0
26	1	69.5	117.9	187.4	73.2	79.5	152.8	56.2	2.4	58.6	167.7	158.7	163.2	46.3	45.8	46.05	2	19.15	132	78	166	156	34	24.8	115	4.86	1.14	3.09	0	0
29	1	155.2	77.1	232.3	113.2	79.9	193.1	59.4	2.2	61.6	146.9	151.1	149	52.5	51	51.75	2	23.58	121	78	165	229	39	36.3	65	5.34	1.06	2.27	0	0
49	0	118.6	128.1	246.7	115.8	107.7	223.5	42.4	2.3	44.7	170	161.4	165.7	41.3	43.4	42.35	2	18.37	120	78	136	146	11	18.8	71	4.94	1.17	3.11	0	0
31	1	19.6	23.8	43.4	34.3	43.8	78.1	49.2	0.2	49.4	160.8	154.4	157.6	26.6	25.3	25.95	3	26.4	114	69	152	279	23	17.4	85	5.09	0.77	1.7	0	0
33	0	95.1	62.6	157.7	124.1	83	207.1	27.9	1.5	29.4	159.1	164.3	161.7	44.6	43.7	44.15	2	23.1	122	71	128	197	17	17.9	109	4.27	1.61	2.72	0	0
44	1	27.2	54.1	81.3	45.1	60.7	105.8	54.1	0.7	54.8	132.6	137.3	134.95	23.5	27.9	25.7	3	26.4	105	70	156	236	25	20.3	60	5.8	1.29	3.05	0	0
40	0	172.5	106.4	278.9	204.2	97.5	301.7	45.1	0.7	45.8	197.6	202.5	200.05	38.1	37.6	37.85	2	21.14	124	78	137	197	14	17.9	72	5.57	1.11	2.94	0	0
28	0	112.1	36.7	148.8	112.6	36.3	148.9	39.9	0.6	40.5	163.3	187.8	175.55	49.5	49	49.25	3	24.82	110	68	135	227	31	15.6	108	5.03	1.76	1.59	0	0
27	0	199.1	107.6	306.7	164.5	103.2	267.7	35.9	3.3	39.2	147.6	143.3	145.45	33.1	32.1	32.6	3	26.23	111	72	141	400	17	16.5	98	5.56	1.14	2.79	0	0
29	0	187.7	86.6	274.3	143.6	55.5	199.1	38.6	2.3	40.9	197.9	196.6	197.25	39.8	38.9	39.35	2	22.09	107	58	149	256	11	15.6	77	5.53	1.55	2.43	0	0
40	0	132.6	121.5	254.1	89.9	65.9	155.8	49	2.7	51.7	195.9	187.9	191.9	39.2	39.1	39.15	2	18.94	116	75	137	166	47	58.2	100	5.23	1.2	2.27	0	0
28	1	90.2	189.8	280	93.5	119.6	213.1	42.6	1.4	44	157.4	132.1	144.75	47.4	47.1	47.25	2	23.84	125	78	159	255	20	17.3	100	4.29	1.23	2.73	1	0
34	1	69.8	124.2	194	81.5	52.4	133.9	52.8	2.1	54.9	152.8	152.3	152.55	42.4	41.3	41.85	3	26.03	105	58	150	202	29	21	111	4.49	1.26	3.08	1	0
33	1	32.5	38.7	71.2	27.1	35.9	63	35.7	0.5	36.2	185.6	160.9	173.25	35.2	36.8	36	3	26.22	117	69	143	193	13	18.1	99	5.21	1.18	1.97	0	1
36	1	97.1	89.3	186.4	111.6	199.9	311.5	54.6	1.4	56	165.5	166.4	165.95	33.1	34.1	33.6	3	25.65	122	79	151	171	18	19.2	74	5.34	0.99	2.98	1	1
34	0	55.3	34.6	89.9	52.8	19.6	72.4	28.9	1.1	30	175.6	183.4	179.5	35.6	36.2	35.9	1	17.63	108	81	137	252	12	20.5	58	4.68	1.43	2.44	0	0
41	1	20.6	19	39.6	33.9	33	66.9	49.5	0.1	49.6	152.6	146.4	149.5	31.1	32.2	31.65	2	19.27	121	83	147	134	25	19.2	99	5.18	1.03	2.73	0	0
39	1	152.7	170.1	322.8	100.5	78.9	179.4	62.6	2.6	65.2	180.4	175.1	177.75	48.9	47.7	48.3	3	26.22	123	84	162	172	21	18.5	92	5.02	0.89	2.79	0	0
32	1	11	34	45	28.1	58.9	86.9	41.6	0.2	41.8	195.9	197.6	196.75	22.2	21.6	21.9	2	19.38	116	73	144	352	28	22.5	88	4.3	0.96	2.4	1	1
39	1	45.8	97	142.8	53.6	108.5	162.1	50.2	0.4	50.6	152.5	156.2	154.35	41.8	42.3	42.05	2	21.8	122	56	128	210	12	24.4	53	4.49	0.96	2.52	1	0
34	0	245.4	96.8	342.2	206.3	86.7	293	38.4	1.7	40.1	133	136.8	134.9	65.8	67.1	66.45	3	25.08	112	72	131	135	17	23.9	137	4.67	1.64	2.44	0	0
25	1	120.6	151.9	272.5	112	82.2	194.2	50.8	2.1	52.9	158.4	162.2	160.3	49.9	47	48.45	3	25.5	137	90	144	255	22	28.4	85	4.58	1.3	2.9	0	0
38	1	97.2	235.4	332.6	82.8	168	250.8	54.2	1.2	55.4	166.4	171	168.7	47.6	46.3	46.95	3	25.47	130	68	146	205	16	20.2	67	4.89	1.1	3.18	0	0
27	1	86.5	92.2	178.7	86	67.3	153.3	35.1	1.3	36.4	182.2	168.8	175.5	49.3	48.5	48.9	2	22.6	124	74	153	253	20	19.6	71	5.08	0.98	3.7	0	0
24	0	82.7	42.7	125.4	85.3	33.4	118.7	43.9	1.7	45.6	205.6	202.9	204.25	30.8	31.8	31.3	2	20.12	128	68	144	220	15	16.9	111	4.78	1.47	2.68	0	0
31	0	56.5	23.4	79.9	46.5	25.3	71.8	40.4	1	41.4	146	146.9	146.45	34.2	33	33.6	2	19.53	124	78	120	186	14	19.4	96	4.74	1.72	1.54	0	0
38	0	82.4	34.4	116.8	115.7	53.5	169.2	38	1.6	39.6	196.8	190.6	193.7	47.6	46.2	46.9	2	23.52	109	70	115	260	15	21	116	6.53	1.25	1.7	0	0
27	1	122.8	218.1	340.9	127.9	130.3	258.2	47.4	1.4	48.8	199.8	204.1	201.95	44.5	44.6	44.55	3	24.62	115	74	137	284	26	23.1	118	4.8	0.81	1.37	0	0
32	1	103.2	183.5	286.7	81.8	131.7	213.5	53.7	1.9	55.6	153.6	146.8	150.2	52	51.1	51.55	3	24.93	126	74	138	279	32	21.2	112	4.6	0.92	1.72	0	0
54	0	119.9	83.8	203.7	131.4	46	177.4	26.3	2	28.3	142.2	132.3	137.25	49	47.1	48.05	2	23.67	119	66	116	242	9	19.5	142	4.94	1.34	2.79	0	0
53	0	158.9	134.4	293.3	152.6	95.1	247.7	35.6	1.3	36.9	139.8	131.3	135.55	69.3	67.6	68.45	3	24.14	107	64	99	178	12	19.7	80	5.17	1.34	2.97	1	0
36	1	44.6	125	169.6	48.7	64.3	113	48.1	2.3	50.4	175.5	171.9	173.7	37	39.1	38.05	2	20.55	108	61	163	229	22	27	62	7.11	1.01	2.57	0	0
50	0	147.7	104.7	252.4	130.4	64.6	195	32.6	1.8	34.4	127.3	121.8	124.55	47.4	53.8	50.6	3	24.67	98	75	140	271	12	19.6	92	4.87	0.82	2.14	0	0
44	0	87.1	99.9	187	98.1	65.2	163.3	45.3	3.1	48.4	156.9	141.5	149.2	35.7	31.5	33.6	3	25.07	117	79	126	213	13	13.4	63	4.95	0.97	2.14	0	0
51	0	283.3	139.3	422.6	255.1	110.8	365.9	37.1	1.5	38.6	143	136.8	139.9	60.3	58.1	59.2	4	31.64	113	75	130	259	14	28.8	75	5.1	1.42	2.85	0	0
39	1	96.3	221.5	317.8	71.7	196.1	267.8	43.8	1.5	45.3	160.4	161.4	160.9	47.8	46.5	47.15	2	23.92	110	72	151	244	29	32.8	71	5.11	1.53	3.81	0	0
38	0	117.3	108.2	225.5	110.3	89.8	200.1	26.9	1.6	28.5	160.5	153.9	157.2	47	42.8	44.9	2	20.78	109	71	132	188	8	16	45	4.88	1.11	2.32	0	0
46	0	168.5	179.1	347.6	178.2	104.9	283.1	44.5	2.5	47	194.2	191.2	192.7	33	34.1	33.55	3	24.41	123	66	126	242	39	31	88	5.45	1.33	3.58	0	0
39	1	141.2	251.7	392.9	137.6	157.7	295.3	59.1	3.3	62.4	158.9	161	159.95	41.1	44	42.55	3	27.73	131	71	155	284	37	18.9	83	5.8	1.09	3.73	0	0
47	0	170.2	37.7	207.9	155.2	63.3	218.5	35.3	1.8	37.1	182.9	186	184.45	34.4	34.8	34.6	2	21.26	130	84	134	199	14	20.1	61	4.99	1.2	2.32	0	0
29	0	78.4	35.2	113.6	76.7	27.2	103.9	22.7	1	23.7	166.3	168.2	167.25	20.5	24.1	22.3	2	18.82	101	70	141	225	7	11.7	72	4.78	1.34	2.02	0	0
41	1	100.8	180.3	281.1	90.7	145.8	236.5	45.8	2.3	48.1	204.4	201.5	202.95	43.1	43.2	43.15	3	24.37	109	82	148	227	15	19.5	73	5.8	0.92	2.69	1	0
55	0	139.6	196.6	336.2	134.6	97.6	232.2	29.7	6.3	36	90.8	79.7	85.25	65.2	54.3	59.75	3	26.02	111	73	129	279	3	14	112	4.47	1.53	2.45	0	0
57	0	314.8	137.2	452	227.6	86.8	314.4	45.8	6	51.8	162.6	152.1	157.35	56.9	52.9	54.9	4	31.88	120	70	126	192	12	16	55	6.08	1.57	3.64	0	0
44	1	85.8	255.7	341.5	89.8	168.9	258.7	60.3	3.4	63.7	134.1	135.6	134.85	54.2	55.7	54.95	3	25.41	137	86	153	212	22	17.7	110	10.66	0.86	2.82	0	0
39	0	129.1	141.1	270.2	109.5	102.6	212.1	43.5	1.2	44.7	229.3	218.5	223.9	16.3	14.2	15.25	3	24.16	117	75	89	401	24	27.2	78	5.63	0.85	2.58	0	0
33	1	67.6	176.8	244.4	69.3	94.8	164.1	43.7	0.8	44.5	136.3	134.7	135.5	44.7	44.8	44.75	2	23.63	113	85	157	371	13	13.9	135	6.63	1.25	3.92	0	0
31	1	96.1	70.4	166.5	130	78.6	208.6	48.8	0.4	49.2	173.7	169.6	171.65	29.8	31.6	30.7	3	25.28	125	75	144	244	14	13.8	107	5.3	1.03	2.52	0	0
33	0	132.7	85.3	218	127.8	76.9	204.7	35	1	36	202.4	194.4	198.4	32.3	34.3	33.3	2	22.36	107	74	121	235	26	17.9	71	5.02	1.18	2.01	0	0
40	0	124.4	37.9	162.3	111	59.1	170.1	36.3	0.7	37	135.2	139.1	137.15	45.2	41.8	43.5	2	23.99	109	64	121	307	20	20.7	67	5.21	1.1	2.82	0	0
26	1	83.5	201.1	284.6	81.6	120.6	202.2	43.8	0.8	44.6	150.3	151	150.65	61.4	54.6	58	3	24.33	139	79	165	294	57	31.8	79	5.49	1.2	3.45	1	1
28	1	83.9	195.2	279.1	81.7	136.3	218	58.8	2	60.8	149.6	148.5	149.05	49.8	48.4	49.1	3	25.99	128	79	146	275	28	28.3	118	5.63	1.14	3.06	1	0
